# Supplementary material for: Is hydrogen electronegativity higher than Pauling’s value? New clues from the 13C and 29Si NMR chemical shifts of [CHF3] and [SiHF3] molecules
Source: publisher site journal article supplement (doi:10.1515/pac-2019-0202), 2019-08-17
Supplement: Supplementary file 1 [file pac-2019-0202_suppl.docx]

**Table S1.** Ionic radii overall sum of the atomic substituents, ; Pauling electronegativities overall sum of the atomic substituents, ; and literature (13C) NMR chemical shifts data reported for [CX4] compounds (X4 = combination of four halido ligands).

| Compound | / pm |  | / pm | (13C) / ppm | Ref. |
| --- | --- | --- | --- | --- | --- |
| [CF4] | 532 | 15.92 | 198.0 | 119.9 | [33] |
| [CF3Cl] | 580 | 15.10 | 148.0 | 125.5 | [33] |
| [CF3Br] | 595 | 14.90 | 137.6 | 112.7 | [33] |
| [CF3I] | 619 | 14.60 | 127.3 | 78.2 | [33] |
| [CF2Cl2] | 628 | 14.28 | 99.7 | 126.2 | [32] |
| [CF2ClBr] | 643 | 14.08 | 91.4 | 107.9* | [32] |
| [CF2Br2] | 658 | 13.88 | 82.7 | 90.5 | [32] |
| [CF2ClI]* | 667 | 13.78 | 83.5 | 63.7* | [32] |
| [CFCl3] | 676 | 13.46 | 54.8 | 117.6 | [32] |
| [CF2BrI] | 682 | 13.58 | 76.4 | 41.9* | [32] |
| [CFBr3] | 721 | 12.86 | 35.9 | 45.9 | [32] |
| [CCl4] | 724 | 12.64 | 14.5 | 96.7 | [43] |
| [CCl3Br] | 739 | 12.44 | 10.0 | 67.8 | [43] |
| [CCl2Br2] | 754 | 12.24 | 6.9 | 35.0 | [44] |
| [CCl3I] | 763 | 12.14 | 9.1 | 4.3 | [32] |
| [CClBr3] | 769 | 12.04 | 2.8 | 5.1 | [43] |
| [CCl2BrI] | 778 | 11.94 | 6.0 | −28.6* | [32] |
| [CBr4] | 784 | 11.84 | 0.0 | −28.5 | [43] |
| [CBr3I] | 808 | 11.54 | 0.0 | −94.4* | [32] |
| [CClI3] | 841 | 11.14 | 1.5 | −189.3* | [32] |
| [CBrI3] | 856 | 10.94 | 0.0 | −226.5* | [32] |
| [CI4] | 880 | 10.64 | 0.0 | −292.3 | [45] |

Experimental and * calculated (13C) NMR chemical shifts.

**Table S2.** Ionic radii overall sum of the atomic substituents, ; Pauling electronegativities overall sum of the atomic substituents, ; and literature (29Si) NMR chemical shifts, reported for [SiX4] compounds (X4 = combination of four halido ligands).

| Compound | / pm |  | / pm | (29Si) / ppm | Ref. |
| --- | --- | --- | --- | --- | --- |
| [SiF4] | 532 | 15.92 | 261.1, | −112.0 | [47] |
| [SiF3Cl] | 580 | 15.10 | 197.0, | −68.7 | [48] |
| [SiF2Cl2] | 628 | 14.28 | 139.2, | −42.0 | [47] |
| [SiFCl3] | 676 | 13.46 | 82.7, | −19.1 | [47] |
| [SiCl4] | 724 | 12.64 | 35.0, | −20.0 | [49] |
| [SiCl3Br] | 739 | 12.44 | 25.3, | −34.3 | [49] |
| [SiCl2Br2] | 754 | 12.24 | 16.4, | −50.7 | [49] |
| [SiCl3I] | 763 | 12.14 | 16.5, | −75.4 | [49] |
| [SiClBr3] | 769 | 12.04 | 8.4, | −69.8 | [49] |
| [SiCl2BrI] | 778 | 11.94 | 10.2, | −98.9 | [49] |
| [SiBr4] | 784 | 11.84 | 1.9, | −92.7 | [49] |
| [SiClBr2I] | 793 | 11.74 | 4.1, | −122.8 | [49] |
| [SiCl2I2] | 802 | 11.64 | 5.7, | −151.5 | [49] |
| [SiBr3I] | 808 | 11.54 | −1.1, | −149.5 | [49] |
| [SiClBrI2] | 817 | 11.44 | 1.9, | −181.9 | [49] |
| [SiBr2I2] | 832 | 11.24 | −1.8, | −212.3 | [49] |
| [SiClI3] | 841 | 11.14 | 1.6, | −245.9 | [49] |
| [SiBrI3] | 856 | 10.94 | −0.8, | −280.1 | [49] |
| [SiI4] | 880 | 10.64 | 1.8, | −351.7 | [49] |

**Table S3.** Ionic radii overall sum of atomic substituents, ; Pauling electronegativities overall sum of atomic substituents, ; overall sum of NMR effective electronegativities of atomic substituents, ; and literature (13C) NMR chemical shifts data, reported for the [CHF3], [CHF2Cl], [CHFCl2] and [CH2F2] compounds, characterized by .

| Compound | / pm |  |  | / pm | (13C) / ppm | Ref. |
| --- | --- | --- | --- | --- | --- | --- |
| [CHF3] | 607 | 14.14 | 14.69 | 123.391 | 118.8 | [32] |
| [CHF2Cl] | 655 | 13.32 | 13.87 | 75.937 | 117.3 | [32] |
| [CH2F2] | 682 | 12.36 | 13.46 | 51.156 | 111.2 | [32] |
| [CHFCl2] | 703 | 12.5 | 13.05 | 32.375 | 105.1 | [32] |

**Table S4.** Ionic radii overall sum of atomic substituents, ; Pauling electronegativities overall sum of atomic substituents, ; overall sum of NMR effective electronegativities of atomic substituents, ; and literature (29Si) NMR chemical shifts data, reported for the [SiHF3] and [SiH2F2] compounds, characterized by .

| Compound | / pm |  |  | / pm | (29Si) / ppm | Ref. |
| --- | --- | --- | --- | --- | --- | --- |
| [SiHF3] | 607 | 14.14 | 14.69 | 173.17 | −77.8 | [42] |
| [SiH2F2] | 682 | 12.36 | 13.46 | 79.931 | −28.5 | [42] |
